# Supplementary material for: Electro-thermally induced structural failure actuator (ETISFA) for implantable controlled drug delivery devices based on Micro-Electro-Mechanical-Systems
Source: Royal Society of Chemistry journal article supplement (doi:10.1039/c005135g), 2010-01-01
Supplement: c005135g.pdf [file c005135g.pdf]

**Diffusion Profile Derivation:**

*Mass Balance on the device reservoir:*

$$dM_r/Dt = -m,$$

where  $m$  is the rate of mass efflux and  $M_r$  is the mass in the reservoir.

$$dM_r/dt = -A \cdot J,$$

where  $A$  is the area for flux and  $J$  is the flux as defined by Fick's law.

$$dM_r/dt = A \cdot D \cdot dC/dx,$$

where  $C$  is the concentration in the reservoir and  $x$  is the direction normal to the interfacial area. Assume: The change in concentration that drives diffusion occurs over the thickness of the chip.

The concentration profile across the chip is linear (i.e. the time scale to achieve a linear profile is much less than the rate of mass efflux.) The external bath is large enough and replaced frequently enough such that it remains at sink conditions.

$$dM_r/dt = -A \cdot D \cdot M_r/(l \cdot V),$$

where  $V$  is the volume of the reservoir and  $l$  is the thickness of the chip. Solving the first order ODE and applying the initial condition  $M_r(0) = M_0$  we get:

$$M_r/M_0 = \exp(-k \cdot t),$$

$$k = A \cdot D/(l \cdot V),$$

*Mass Balance on the environment:*

$$dM/dt = -dM_r/dt,$$

where  $M$  is the mass released into the environment. Solving the ODE results in:

$$M = C - M_r,$$

where  $C$  is a constant of integration. Set the initial condition of  $M(0) = 0$ :

$$M(t) = 1 - \exp(-k \cdot t),$$

$$k = A \cdot D/(l \cdot V).$$

Supplementary Material (ESI) for Lab on a Chip

This journal is © The Royal Society of Chemistry 2010
